# Supplementary material for: A comprehensive survey of genetic variation in 20,691 subjects from four large cohorts
Source: PubMed Central journal article supplement (PMC5354293; doi:10.1371/journal.pone.0173997), 2017-03-16
Supplement: pone.0173997.s002.pdf [file pone.0173997.s002.pdf]

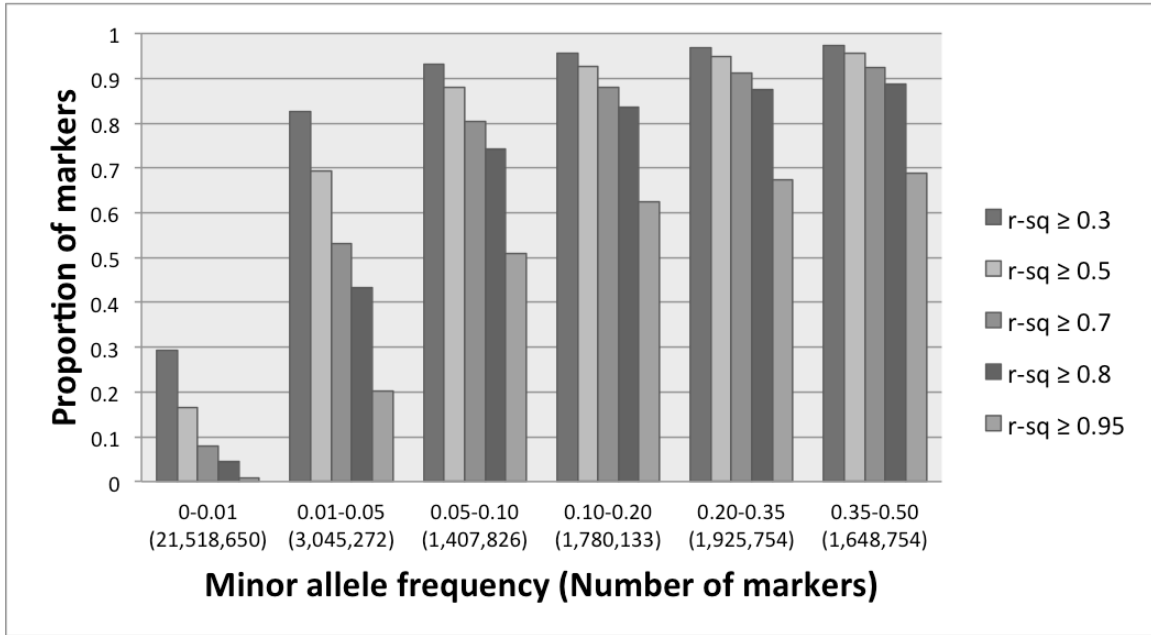

**S2 Fig. Proportion of successfully imputed markers on the Illumina HumanHap platform.**

Different colors correspond to different imputation quality score r-sq thresholds. Data is categorized by minor allele frequency.
