# Supplementary material for: A comprehensive survey of genetic variation in 20,691 subjects from four large cohorts
Source: PubMed Central journal article supplement (PMC5354293; doi:10.1371/journal.pone.0173997), 2017-03-16
Supplement: pone.0173997.s004.pdf [file pone.0173997.s004.pdf]

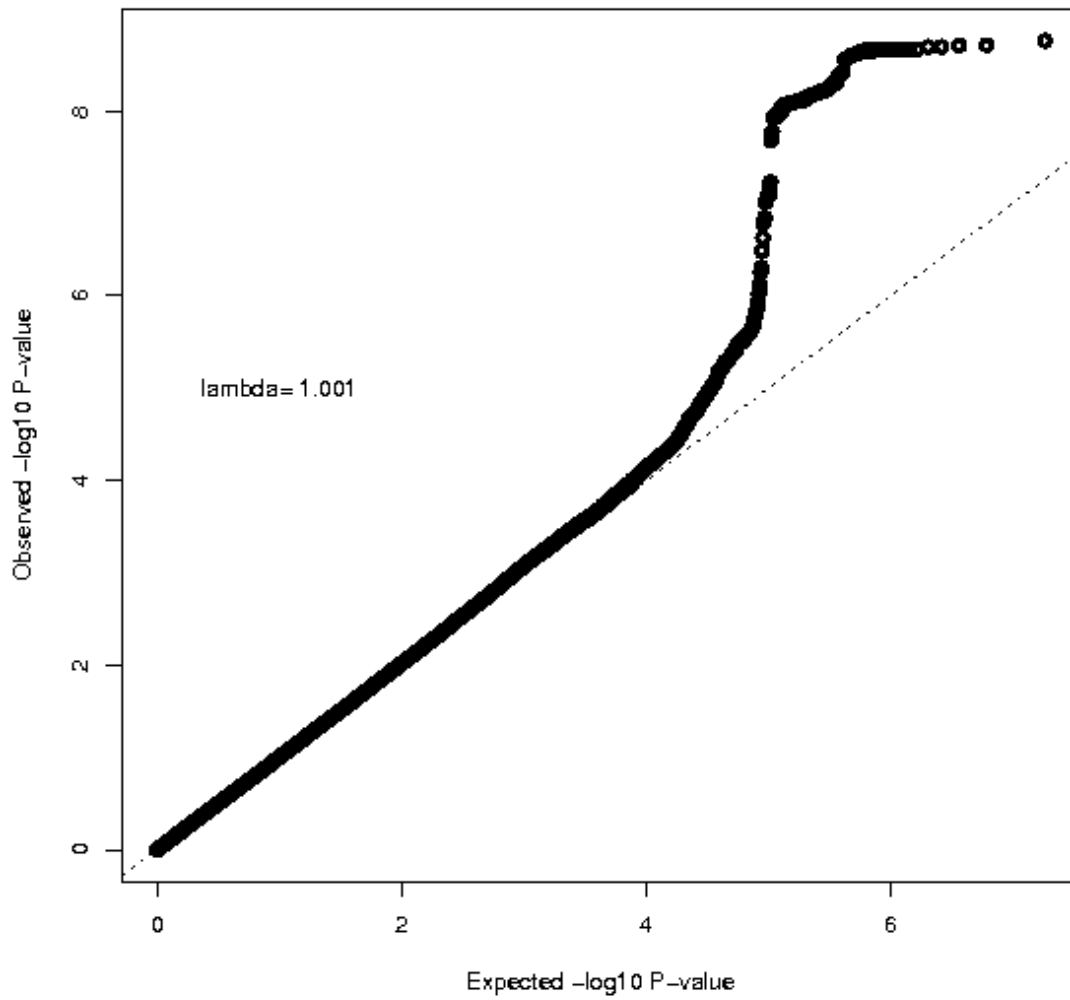

S4a Fig. QQ-plot for GWAS analysis of body mass index on the Illumina Omniexpress platform (n=5,844).

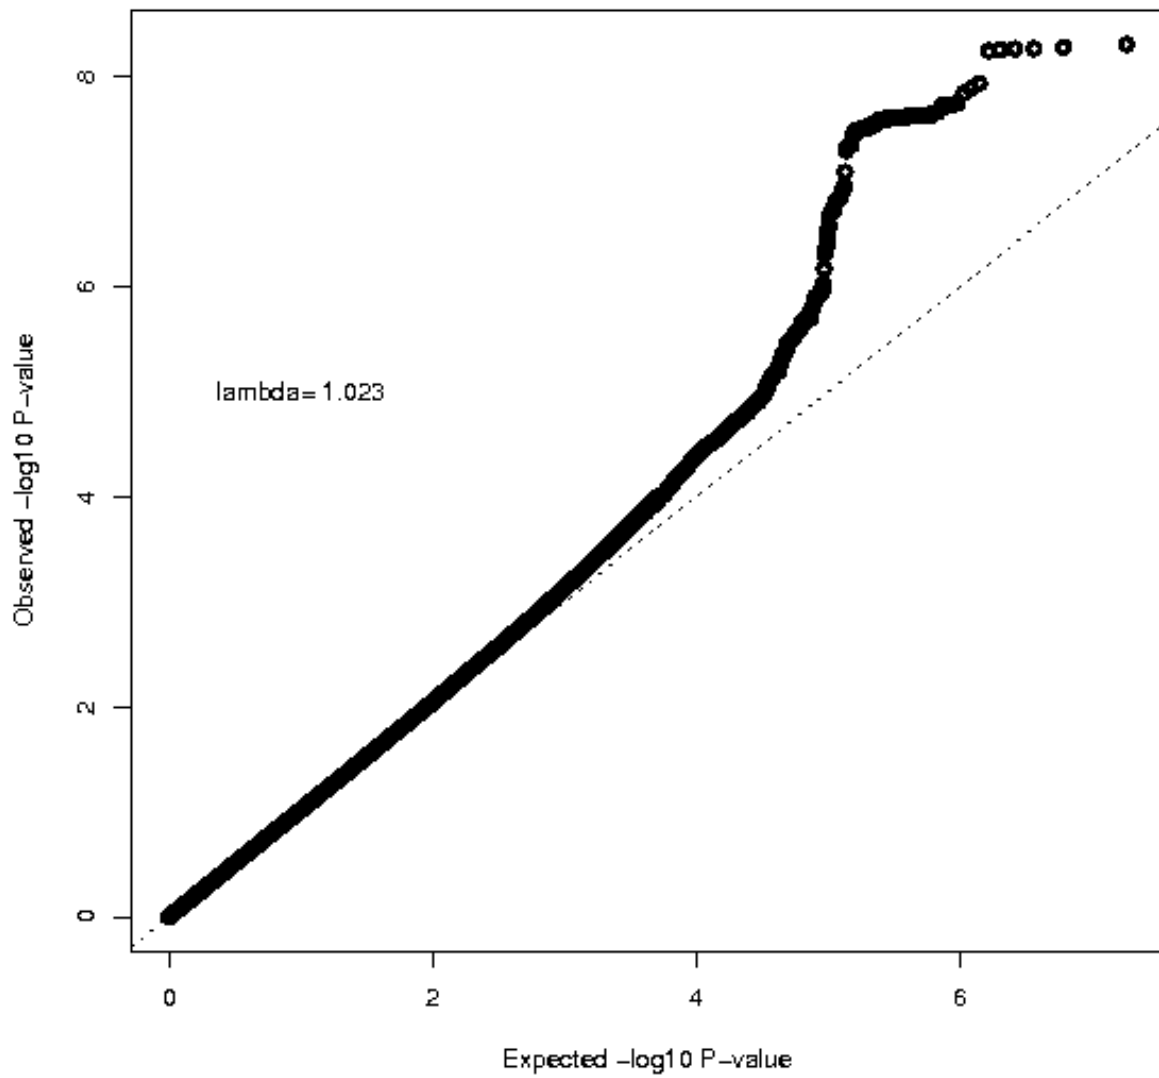

S4b Fig. QQ-plot for GWAS analysis of body mass index on the Affymetrix platform (n=7,677).

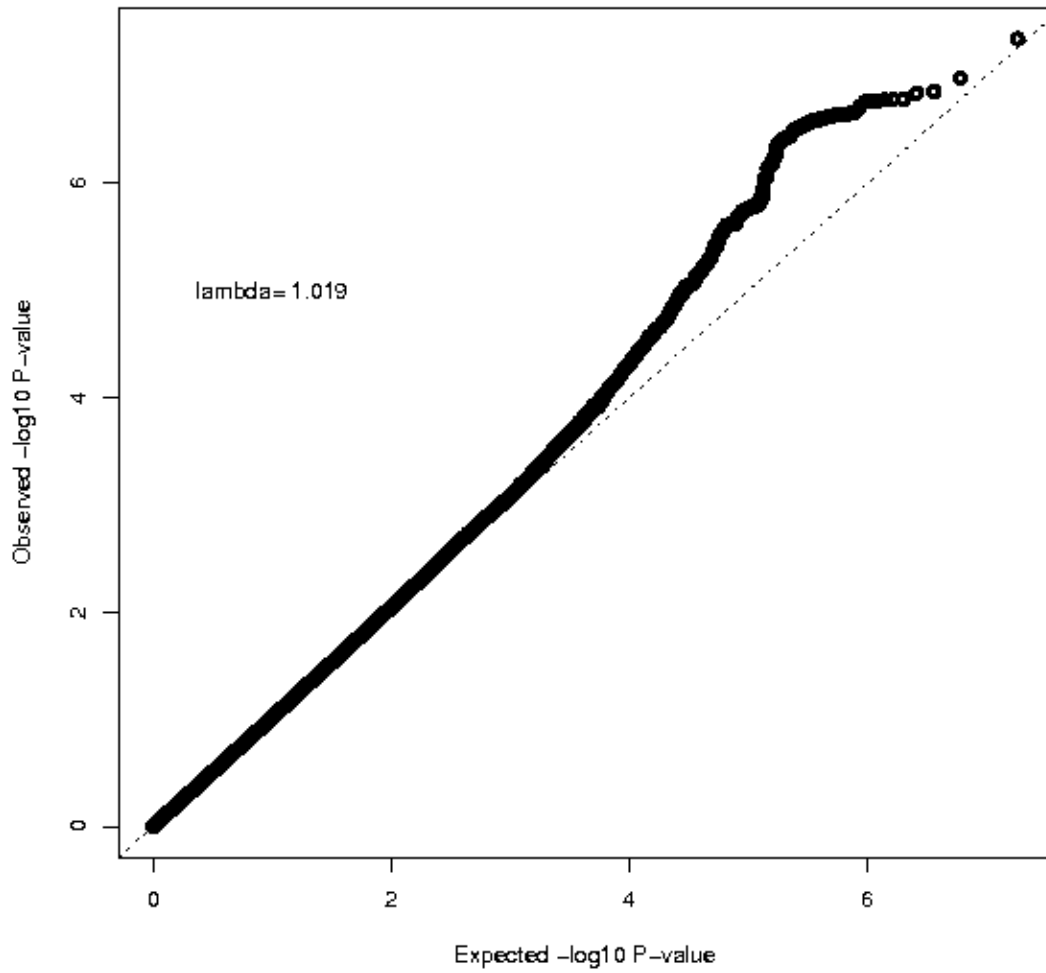

S4c Fig. QQ-plot for GWAS analysis of body mass index on the Illumina HumanHap platform (n=6,762).
