# Supplementary material for: A comprehensive survey of genetic variation in 20,691 subjects from four large cohorts
Source: PubMed Central journal article supplement (PMC5354293; doi:10.1371/journal.pone.0173997), 2017-03-16
Supplement: pone.0173997.s005.pdf [file pone.0173997.s005.pdf]

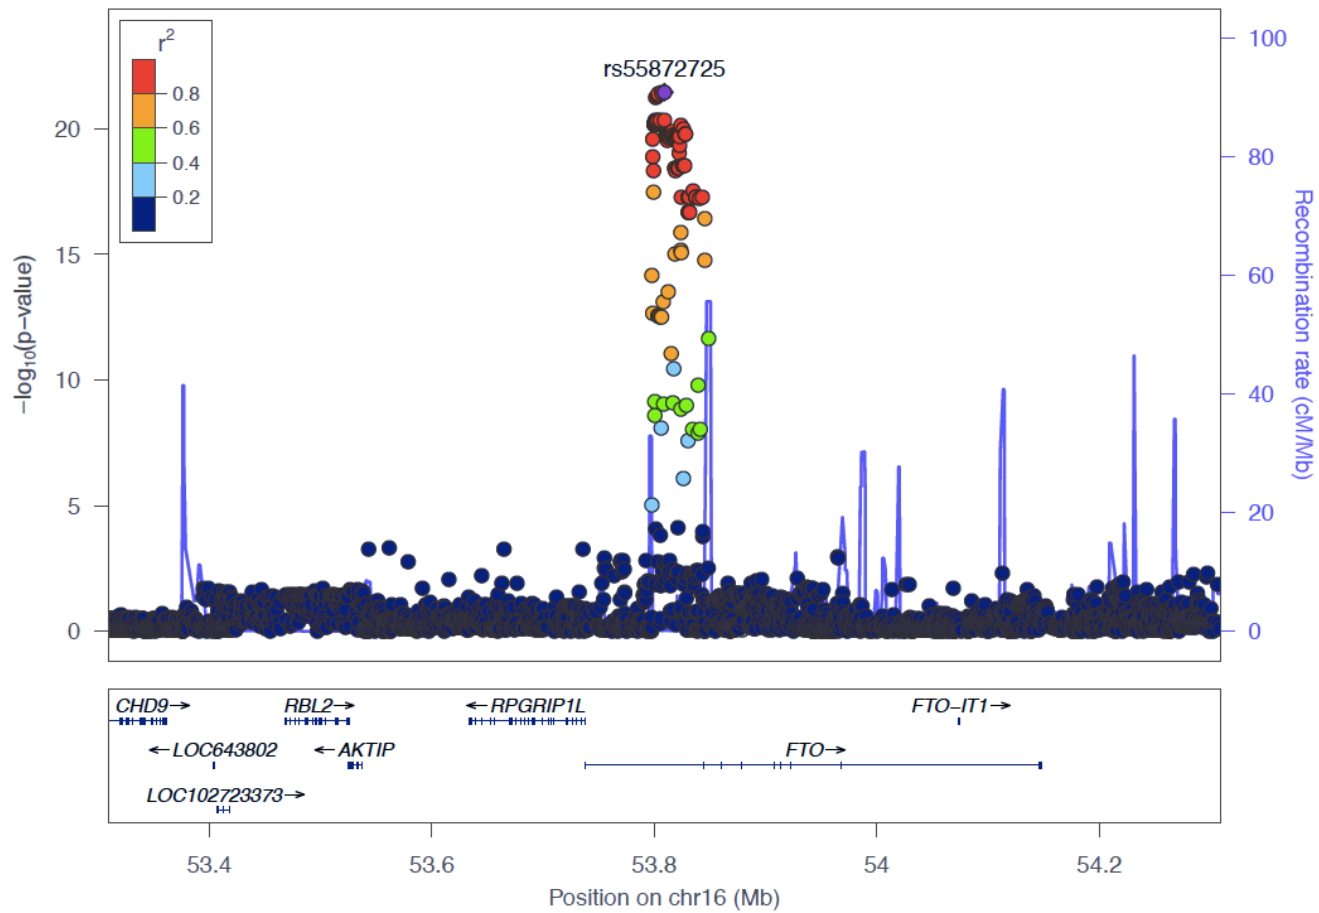

S5a Fig. LocusZoom plot for the BMI *FTO* locus.

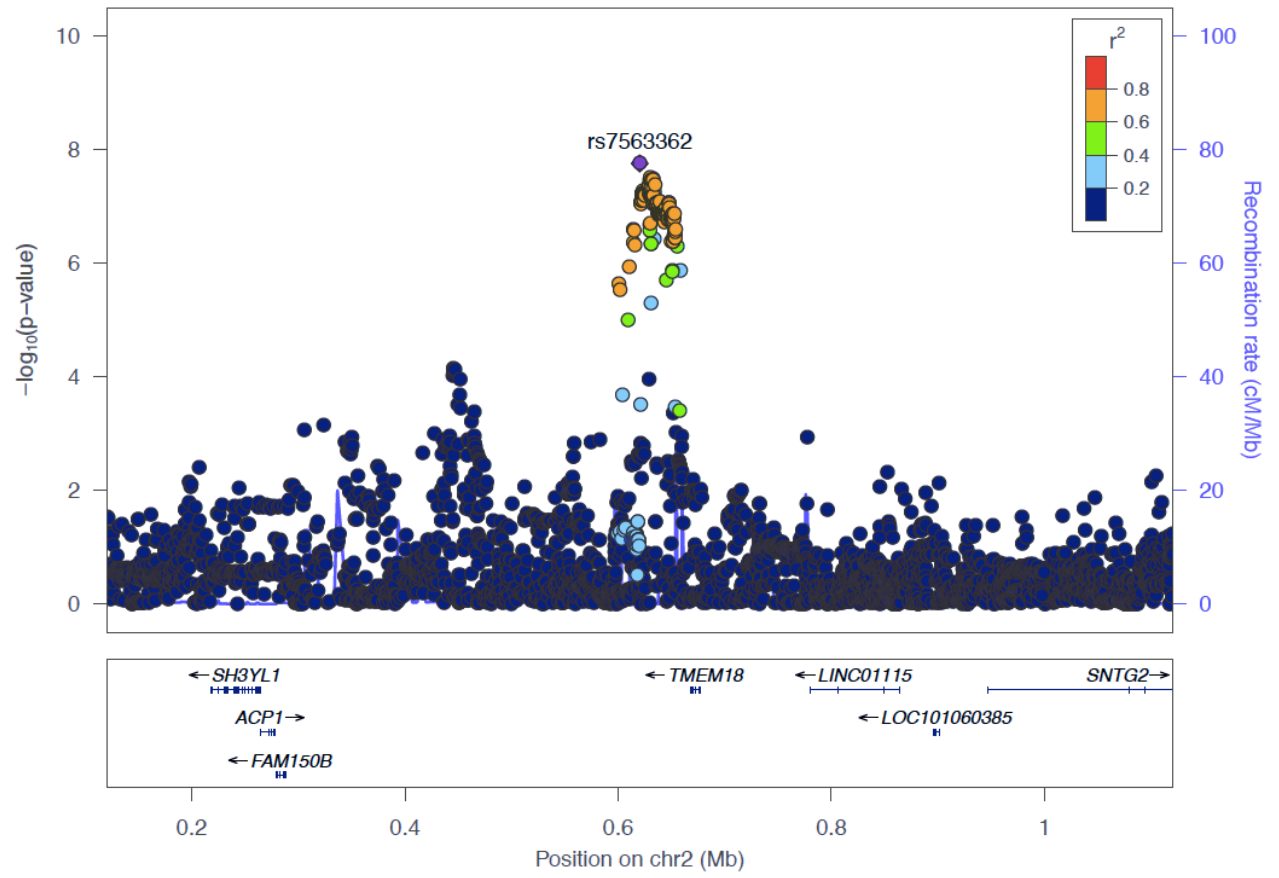

S5b Fig. LocusZoom plot for the BMI *TMEM18* locus.

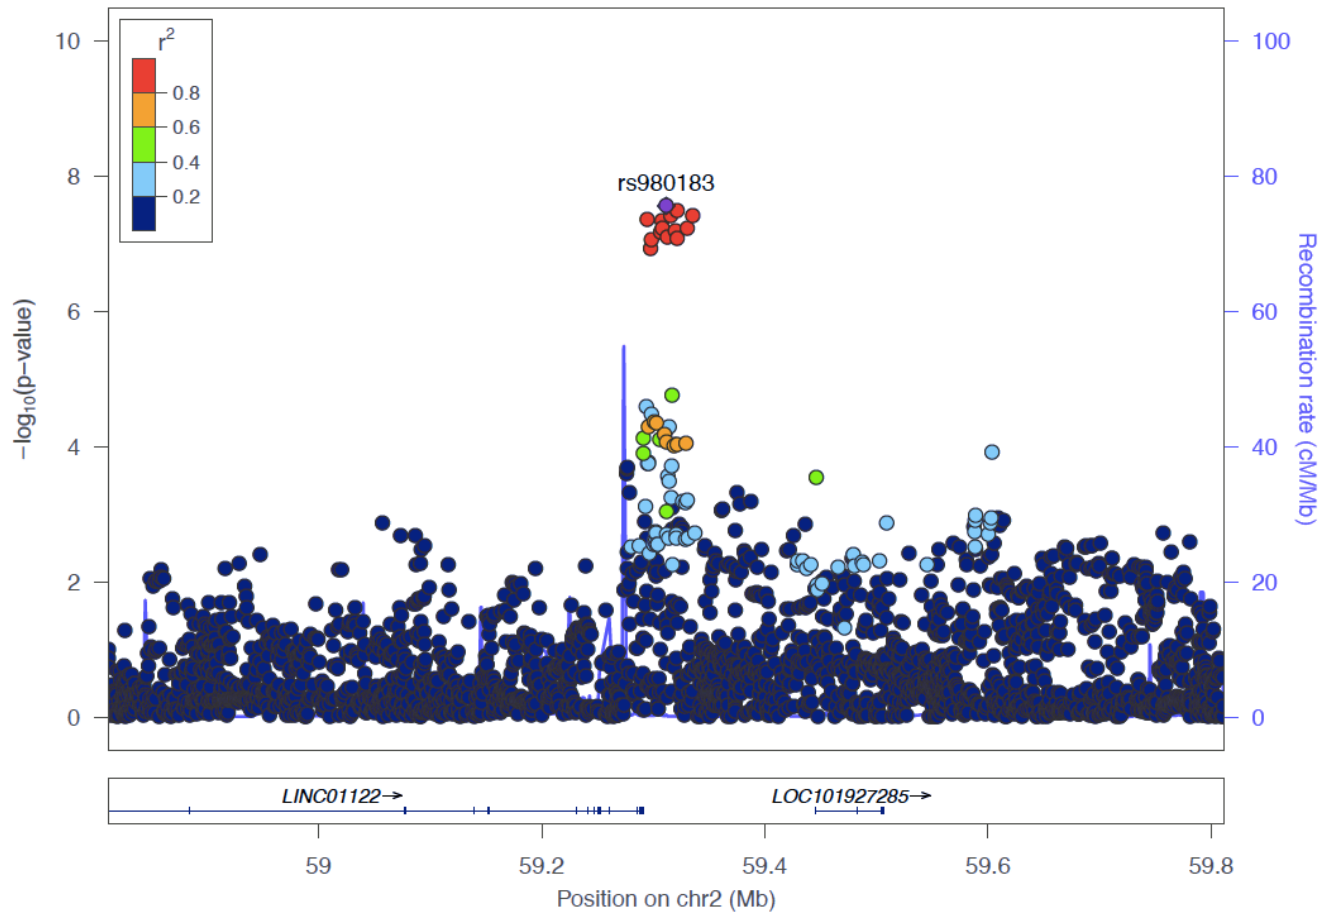

S5c Fig. LocusZoom plot for the BMI FANCL locus.
