# Supplementary material for: A comprehensive survey of genetic variation in 20,691 subjects from four large cohorts
Source: PubMed Central journal article supplement (PMC5354293; doi:10.1371/journal.pone.0173997), 2017-03-16
Supplement: pone.0173997.s006.pdf [file pone.0173997.s006.pdf]

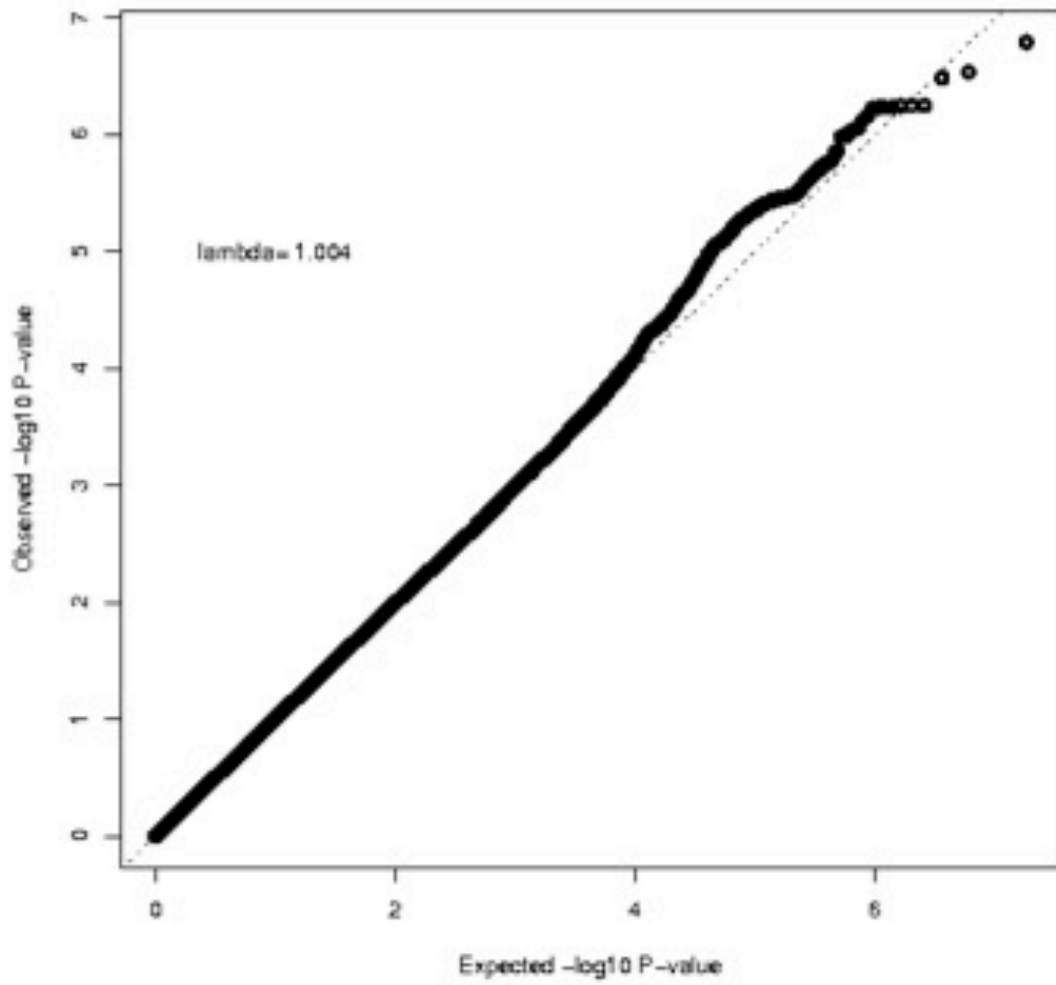

S6a Fig. QQ-plot for GWAS analysis of venous on the Illumina Omniexpress platform (406 cases and 4,786 controls).

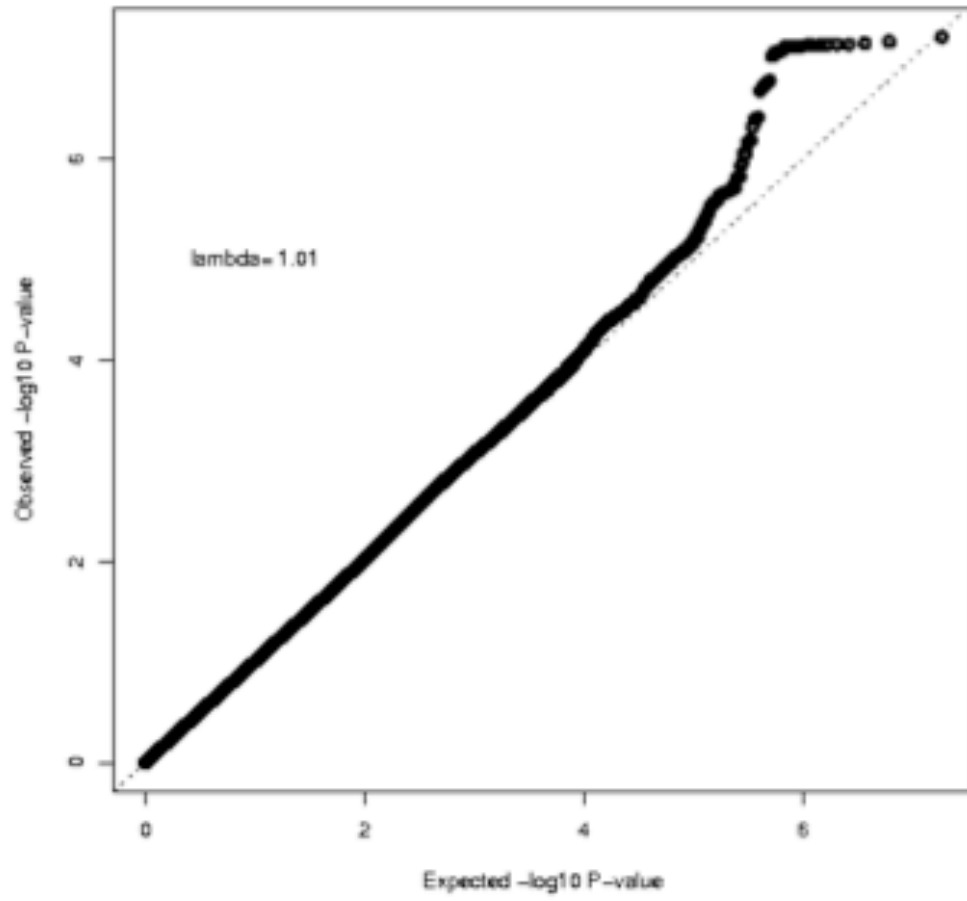

S6b Fig. QQ-plot for GWAS analysis of venous on the Illumina Omniexpress platform (406 cases and 4,786 controls).

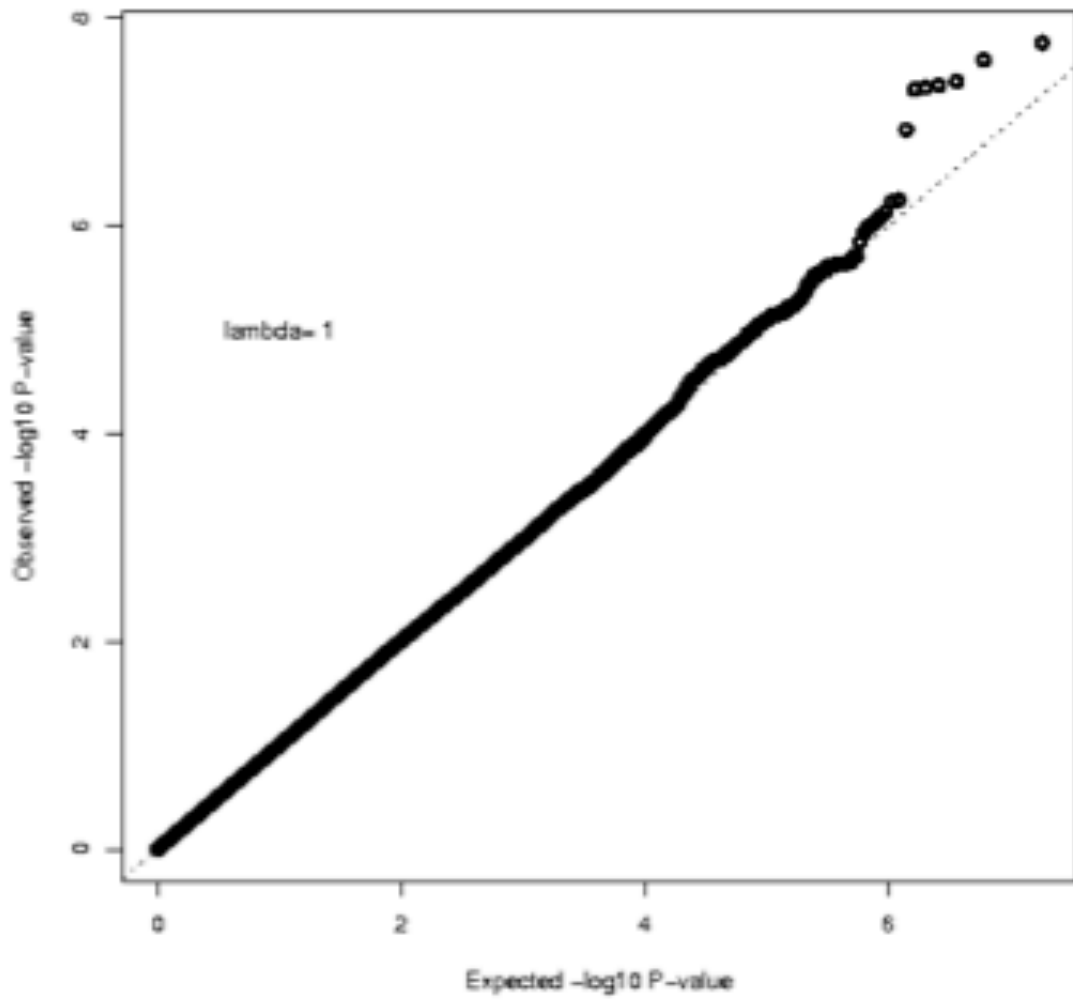

S6c Fig. QQ-plot for GWAS analysis of venous on the Affymetrix platform (532 cases and 7,147 controls).
