# Supplementary material for: A comprehensive survey of genetic variation in 20,691 subjects from four large cohorts
Source: PubMed Central journal article supplement (PMC5354293; doi:10.1371/journal.pone.0173997), 2017-03-16
Supplement: pone.0173997.s008.pdf [file pone.0173997.s008.pdf]

**S1 Table. Number of SNPs (N) with MAF  $\leq$  0.01 overall and by imputation quality score (r-sq) threshold for the three platforms Illumina HumanHap, Affymetrix 6.0 and Illumina Omniexpress.**

| <b>Platform</b>   | <b>N</b>   | <b>mean(r-sq)</b> | <b>N (%) r-sq<math>\geq</math>0.3</b> | <b>r-sq<math>\geq</math>0.5</b> | <b>r-sq<math>\geq</math>0.8</b> | <b>r-sq<math>\geq</math>0.95</b> |
|-------------------|------------|-------------------|---------------------------------------|---------------------------------|---------------------------------|----------------------------------|
| Illumina HumanHap | 21,518,650 | 0.224             | 6,279,290(29.2%)                      | 3,558,835(16.5%)                | 983,575(4.6%)                   | 162,938 (0.8%)                   |
| Affymetrix 6.0    | 21,542,876 | 0.241             | 6,721,060(31.2%)                      | 4,079,981(18.9%)                | 1,375,400(6.4%)                 | 298,816 (1.4%)                   |
| OmniExpress       | 21,554,521 | 0.243             | 6,885,575(31.9%)                      | 4,170,866(19.4%)                | 1,342,897(6.2%)                 | 270,436 (1.3%)                   |
