# Supplementary material for: A comprehensive survey of genetic variation in 20,691 subjects from four large cohorts
Source: PubMed Central journal article supplement (PMC5354293; doi:10.1371/journal.pone.0173997), 2017-03-16
Supplement: pone.0173997.s009.pdf [file pone.0173997.s009.pdf]

**S2 Table. Associations for previously reported lead SNPs in regions that were genome-wide significant in analysis based on 20,283 individuals (BMI) and 1,364 cases and 17,628 controls (VTE) in NHS, NHSII, HPFS and PHS.**

| Trait | SNP            | Chr | Pos       | Effect allele | Effect allele frequency | Effect      | P                      |
|-------|----------------|-----|-----------|---------------|-------------------------|-------------|------------------------|
| BMI   | rs1558902      | 16  | 53803574  | a             | 0.4204                  | 0.4525      | 4.30x10 <sup>-22</sup> |
| BMI   | rs1302173<br>7 | 2   | 632348    | a             | 0.1832                  | -<br>0.3204 | 6.88x10 <sup>-8</sup>  |
| BMI   | rs1016287      | 2   | 59305625  | t             | 0.2953                  | 0.201       | 7.68x10 <sup>-5</sup>  |
| VTE   | rs4524         | 1   | 169511755 | t             | 0.7371                  | 0.0568      | 0.22                   |
| VTE   | rs6025         | 1   | 169519049 | t             | 0.0284                  | 0.7533      | 7.41x10 <sup>-14</sup> |
| VTE   | rs529565       | 9   | 136149500 | t             | 0.6576                  | -<br>0.2154 | 1.80x10 <sup>-7</sup>  |
