# Supplementary material for: A comprehensive survey of genetic variation in 20,691 subjects from four large cohorts
Source: PubMed Central journal article supplement (PMC5354293; doi:10.1371/journal.pone.0173997), 2017-03-16
Supplement: pone.0173997.s010.pdf [file pone.0173997.s010.pdf]

**S3 Table. Association with known VTE SNPs (Germain et al, AJHG 2015) based on our analysis including 1,364 cases and 17,628 controls from NHS, NHSII and HPFS**

| Lead SNP   | Chr. | Gene    | Risk allele | Risk allele frequency | Odds Ratio, Germain et al | P, Germain et al       | Odds Ratio, this study | P, this study          |
|------------|------|---------|-------------|-----------------------|---------------------------|------------------------|------------------------|------------------------|
| rs6025     | 1    | F5      | T           | 0.033                 | 3.25 (2.91–3.64)          | $1.10 \times 10^{-96}$ | 2.12 (1.74–2.59)       | $7.41 \times 10^{-14}$ |
| rs4524     | 1    | F5      | T           | 0.736                 | 1.20 (1.14–1.26)          | $2.65 \times 10^{-11}$ | 1.06 (0.97–1.16)       | 0.22                   |
| rs2066865  | 4    | FGG     | A           | 0.244                 | 1.24 (1.18–1.31)          | $1.03 \times 10^{-16}$ | 1.05 (0.96–1.15)       | 0.27                   |
| rs4253417  | 4    | F11     | C           | 0.405                 | 1.27 (1.22–1.34)          | $1.21 \times 10^{-23}$ | 1.13 (1.04–1.22)       | $3.24 \times 10^{-3}$  |
| rs529565   | 9    | ABO     | C           | 0.354                 | 1.55 (1.48–1.63)          | $4.23 \times 10^{-75}$ | 1.24 (1.14–1.34)       | $1.80 \times 10^{-7}$  |
| rs1799963  | 11   | F2      | A           | 0.01                  | 2.29 (1.75–2.99)          | $1.73 \times 10^{-9}$  | 1.52 (0.87–2.66)       | 0.14                   |
| rs6087685  | 20   | PROCR   | C           | 0.302                 | 1.15 (1.10–1.21)          | $1.65 \times 10^{-8}$  | 1.05 (0.96–1.14)       | 0.31                   |
| rs78707713 | 10   | TSPAN15 | T           | 0.878                 | 1.28 (1.19–1.39)          | $5.74 \times 10^{-11}$ | 1.13 (1.00–1.27)       | $5.93 \times 10^{-2}$  |
| rs2288904  | 19   | SLC44A2 | G           | 0.785                 | 1.19 (1.12–1.26)          | $1.07 \times 10^{-9}$  | 1.05 (0.95–1.15)       | 0.36                   |
